# Supplementary material for: Effects of Vegetarian Diets on Blood Pressure Lowering: A Systematic Review with Meta-Analysis and Trial Sequential Analysis
Source: MDPI journal article supplement (doi:10.3390/nu12061604), 2020-05-29
Supplement: s1 [file s1]

**Table S1.** Search terms used for final search on 6 January 2020.

| Searches | Search terms                                                                                                                                                                        | Medline | PubMed | Cochrane Central Register of controlled trials |
|----------|-------------------------------------------------------------------------------------------------------------------------------------------------------------------------------------|---------|--------|------------------------------------------------|
| #1       | exp diet OR vegetarian OR vegan OR lacto-ovo vegetarian OR lacto vegetarian OR plant based diet OR vegetarianism OR ornish diet OR CHIP diet OR pesco vegetarian OR semi vegetarian | 273649  | 21841  | 17313                                          |
| #2       | exp hypertension                                                                                                                                                                    | 250399  | 11251  | 16856                                          |
| #3       | exp blood pressure                                                                                                                                                                  | 286562  | 18281  | 26961                                          |
| #4       | exp randomized controlled trials as Topic/                                                                                                                                          | 132629  | 740    | 7732                                           |
| #5       | exp clinical trial/                                                                                                                                                                 | 848231  | 14122  | 163                                            |
| #6       | random\$.ab.                                                                                                                                                                        | 1067633 | 262582 | 803155                                         |
| #7       | 1 AND 2                                                                                                                                                                             | 8109    | 795    | 728                                            |
| #8       | 1 AND 3                                                                                                                                                                             | 8056    | 936    | 1363                                           |
| #9       | 4 OR 5 OR 6                                                                                                                                                                         | 1593142 | 276410 | 805284                                         |
| #10      | 7 OR 8                                                                                                                                                                              | 13058   | 1165   | 1686                                           |
| #11      | 9 AND 10                                                                                                                                                                            | 2818    | 75     | 1255                                           |
| #12      | limit 11 to (english language and humans)                                                                                                                                           | 2593    | 72     | 1243                                           |

**Table S2.** Additional information on characteristics of trials.

| First Author (vetarian vs control)                                                  | Year | Area        | Participants                                                                                      | alcohol permitted | Salt permitted | Fatty food permitted | Caffeine permitted | Cigarette permitted | Intention to treat (veg) | Per protocol (veg) | completion % | Intention to treat (control) | Per protocol (control) | completion % |
|-------------------------------------------------------------------------------------|------|-------------|---------------------------------------------------------------------------------------------------|-------------------|----------------|----------------------|--------------------|---------------------|--------------------------|--------------------|--------------|------------------------------|------------------------|--------------|
| Barnard et al., 2009 (Low-fat vegan diet vs conventional diabetes diet)             | 2013 | USA         | Free-living individuals with type 2 diabetes                                                      | Yes               | Yes            | No                   | Unsure             | Unsure              | 49                       | 40                 | 81.6         | 50                           | 43                     | 86           |
| Barnard et al., 2017 (Low-fat vegan diet vs portion-controlled eating plan)         | 2017 | USA         | Individuals with T2DM                                                                             | Yes               | Yes            | Yes                  | Unsure             | Unsure              | 21                       | 19                 | 90.5         | 24                           | 21                     | 87.5         |
| Bloomer et al., 2015 (Traditional Daniel fast vs Modified Daniel fast)              | 2015 | USA         | Free-living individuals (6 men: 30 women), average age of 33 ± 2 years and a range of 18–67 years | No                | No             | No                   | No                 | No                  | 12                       | 12                 | 100          | 12                           | 12                     | 100          |
| Ferdowsian et al., 2010 (low-fat vegan diet vs control diet)                        | 2010 | USA         | Individuals with BMI ≥ 25 and or diabetes, aged 21-65 years                                       | No                | Unsure         | No                   | Unsure             | unsure              | 68                       | 65                 | 95.9         | 45                           | 44                     | 97.8         |
| Hunt et al., 1998 (Lacto-ovo-vegetarian vs non-vegetarian diet)                     | 1998 | USA         | 21 Healthy women aged 33±7 years (ranged 20-42 years)                                             | Unsure            | Yes            | Yes                  | No                 | unsure              | 21                       | 21                 | 100          | 21                           | 21                     | 100          |
| Lee et al., 2016 (Brown rice vegan diet vs conventional diabetic diet)              | 2016 | South Korea | Individual with T2DM (age ranged 32-70)                                                           | Unsure            | Yes            | Yes                  | Unsure             | Unsure              | 53                       | 46                 | 86.8         | 53                           | 47                     | 88.7         |
| Macknin et al., 2015 (Plant-based low fat diet vs American Heart Association diets) | 2015 | USA         | Children (aged 9-18 years)                                                                        | Unsure            | Unsure         | Unsure               | Unsure             | Unsure              | 16                       | 14                 | 87.5         | 14                           | 14                     | 100          |
| Mishra et al., 2013 (low-fat vegan diet vs control diet)                            | 2013 | USA         | Individuals with BMI ≥ 25 and or diabetes                                                         | No                | Unsure         | No                   | Unsure             | unsure              | 142                      | 94                 | 66.2         | 149                          | 117                    | 78.5         |

|                                                                          |      |             |                                                                                                                                                                                                                                                                   |        |        |        |        |        |    |    |      |    |    |      |
|--------------------------------------------------------------------------|------|-------------|-------------------------------------------------------------------------------------------------------------------------------------------------------------------------------------------------------------------------------------------------------------------|--------|--------|--------|--------|--------|----|----|------|----|----|------|
| Nicholson et al., 1999 (low-fat Vegan diet vs control diet)              | 1999 | USA         | Individuals with diabetes                                                                                                                                                                                                                                         | No     | Unsure | Yes    | Unsure | No     | 7  | 7  | 100  | 6  | 4  | 66.7 |
| Prescott et al., 1987 (Lacto-ovo-vegetarian vs non-vegetarian diet)      | 1987 | Australia   | Male and female omnivores, aged 18-60 years, not being treated for hypertension were recruited from hospital staff                                                                                                                                                | Yes    | Yes    | Unsure | Yes    | Yes    | 32 | 25 | 78.1 | 32 | 25 | 78.1 |
| Ramal et al., 2017 (High-fiber low-fat plant based diet vs control diet) | 2017 | USA         | Free-living adults Latino with T2DM                                                                                                                                                                                                                               | Yes    | Unsure | Yes    | Yes    | Yes    | 19 | 17 | 89.5 | 19 | 15 | 78.9 |
| Rouse et al., 1986 (Lacto-ovo-vegetarian vs non-vegetarian diet)         | 1986 | Australia   | Healthy free-living omnivore                                                                                                                                                                                                                                      | Yes    | Yes    | Yes    | Unsure | Unsure | 20 | 20 | 100  | 20 | 19 | 95   |
| Sciarrone et al., 1993 (Lacto-ovo-vegetarian vs non-vegetarian diet)     | 1993 | Australia   | Normotensive men hospital employees (Aged 30-59 years)                                                                                                                                                                                                            | Yes    | Yes    | Unsure | No     | No     | 10 | 10 | 100  | 10 | 10 | 100  |
| Toobert et al., 2000 (Prime time diet vs Usual care diet)                | 2000 | USA         | postmenopausal female and having documented CHD defined as atherosclerosis, myocardial infarction (MI), percutaneous transluminal coronaryangioplasty, life-threatening illnesses, infarction during the preceding 6 weeks, and/or coronary bypass graft surgery. | Unsure | Unsure | Unsure | Unsure | Unsure | 14 | 14 | 100  | 14 | 11 | 78.6 |
| Wright et al., 2017 (Low-fat plant-based diet vs control diet)           | 2017 | New Zealand | Diagnosed with obesity or overweight and at least one of type 2 diabetes, ischaemic heart disease, hypertension or hypercholesterolaemia (aged 35-70 years)                                                                                                       | No     | Yes    | No     | Yes    | No     | 33 | 25 | 75.8 | 32 | 24 | 75   |

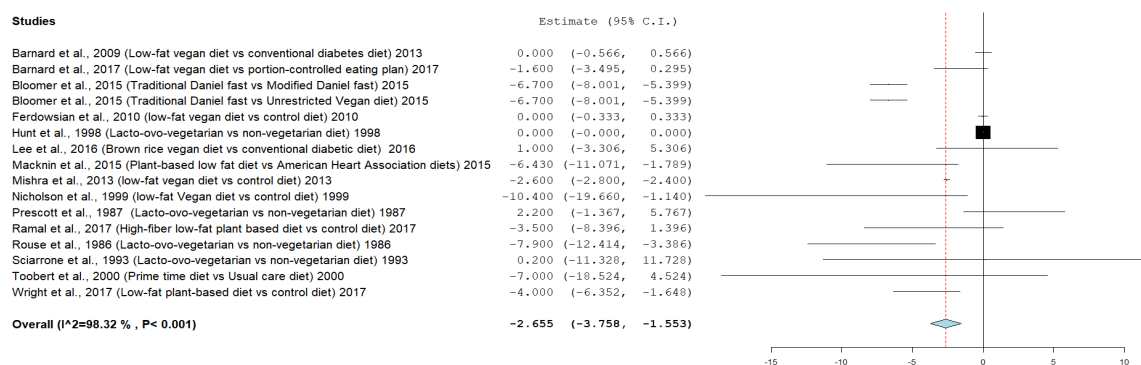

Figure S1. Forest plot for overall systolic blood pressure (inclusive of children).

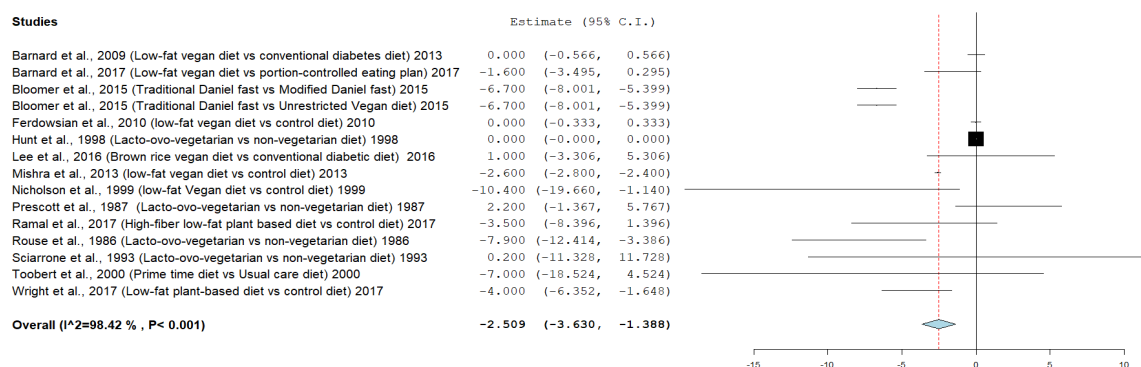

Figure S2. Forest plot for overall systolic blood pressure (exclusive of children).

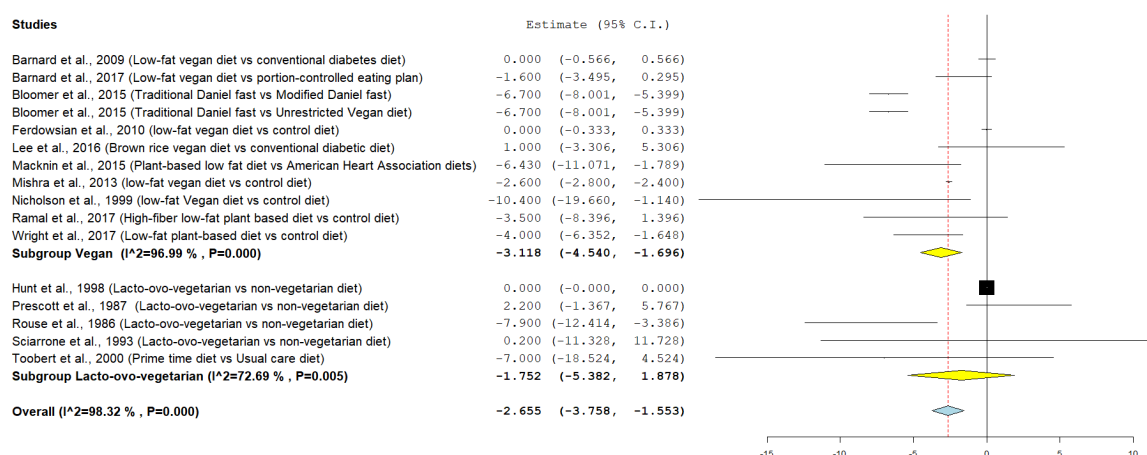

Figure S3. Forest plot for overall systolic blood pressure (diet subgroup).

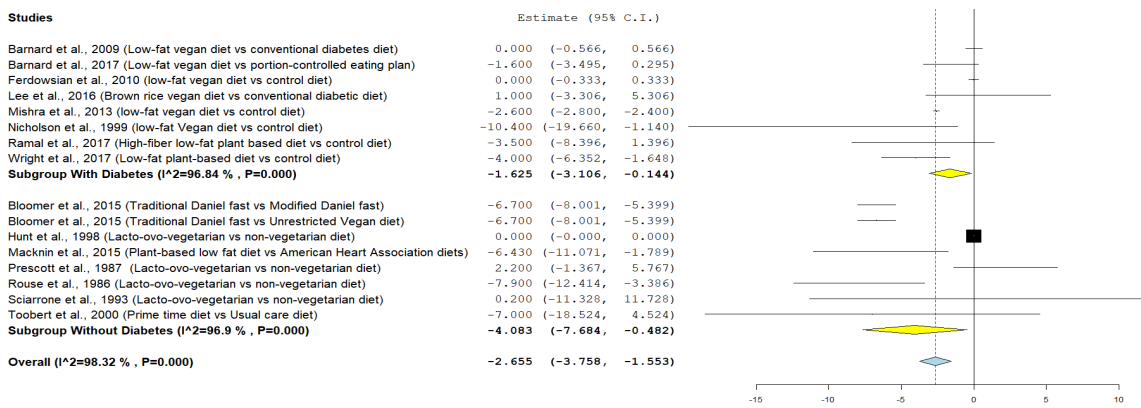

Figure S4. Forest plot for overall systolic blood pressure (diabetes subgroup).

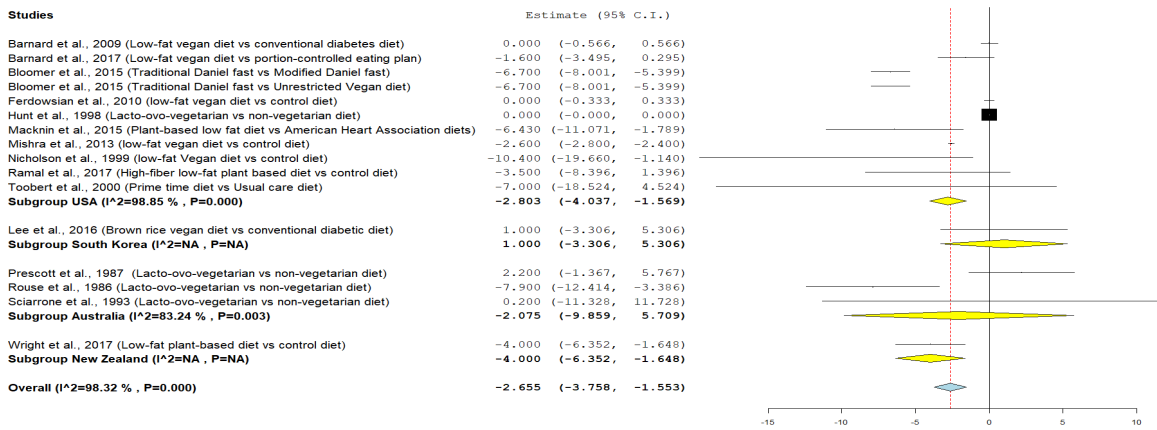

Figure S5. Forest plot for overall systolic blood pressure (country subgroup).

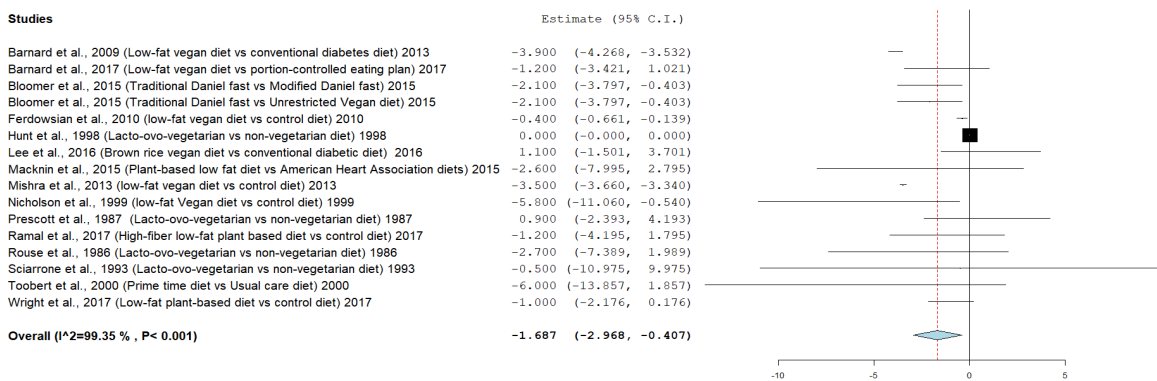

Figure S6. Forest plot for overall diastolic blood pressure (inclusive of children).

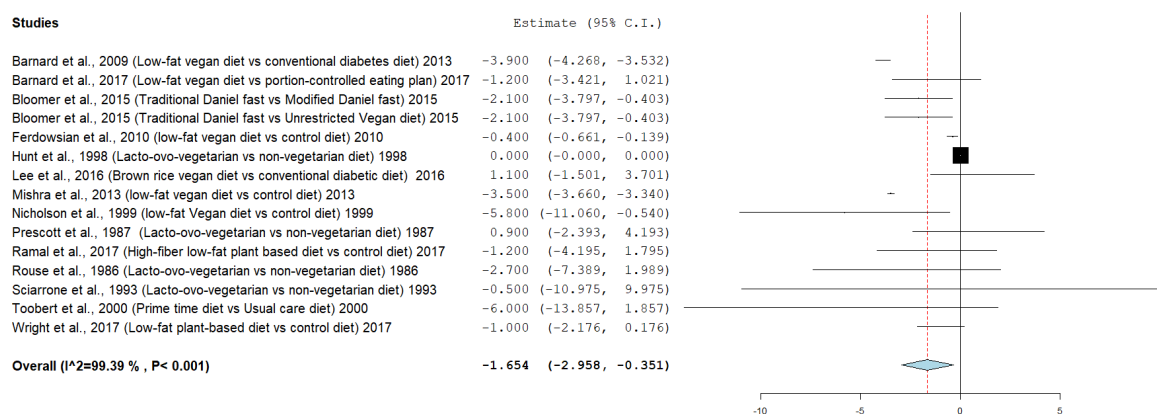

**Figure S7.** Forest plot for overall diastolic blood pressure (exclusive of children).

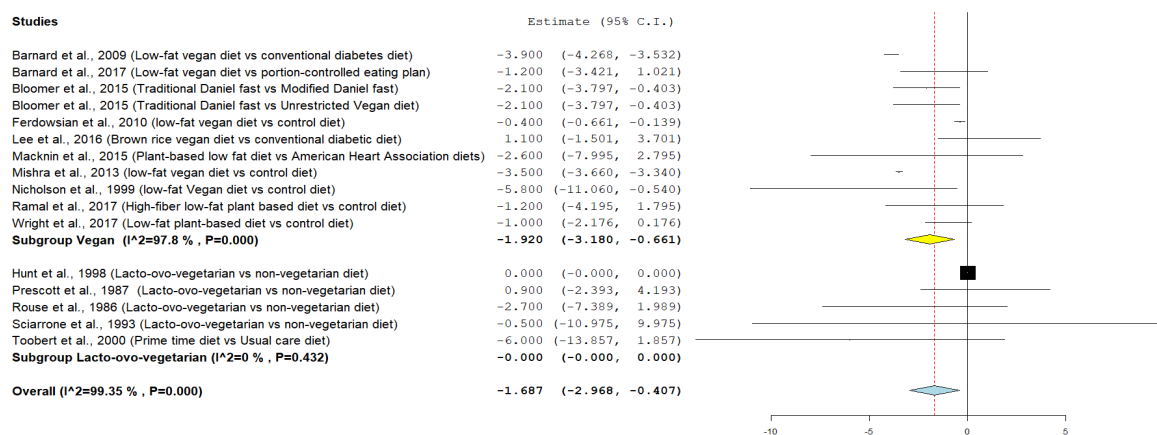

**Figure S8.** Forest plot for overall diastolic blood pressure (diet subgroup).

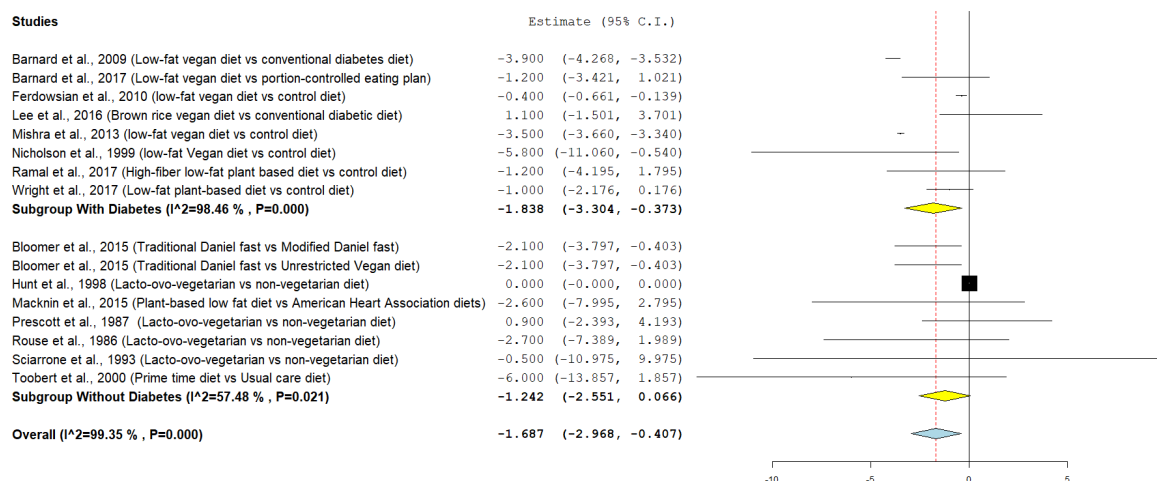

**Figure S9.** Forest plot for overall diastolic blood pressure (diabetes subgroup).

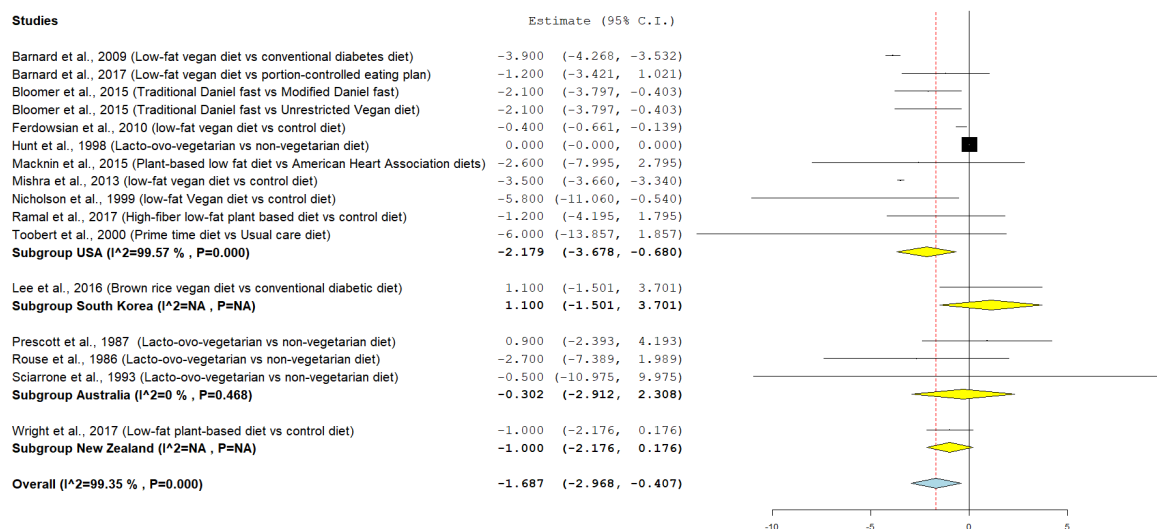

**Figure S10.** Forest plot for overall diastolic blood pressure (country subgroup).

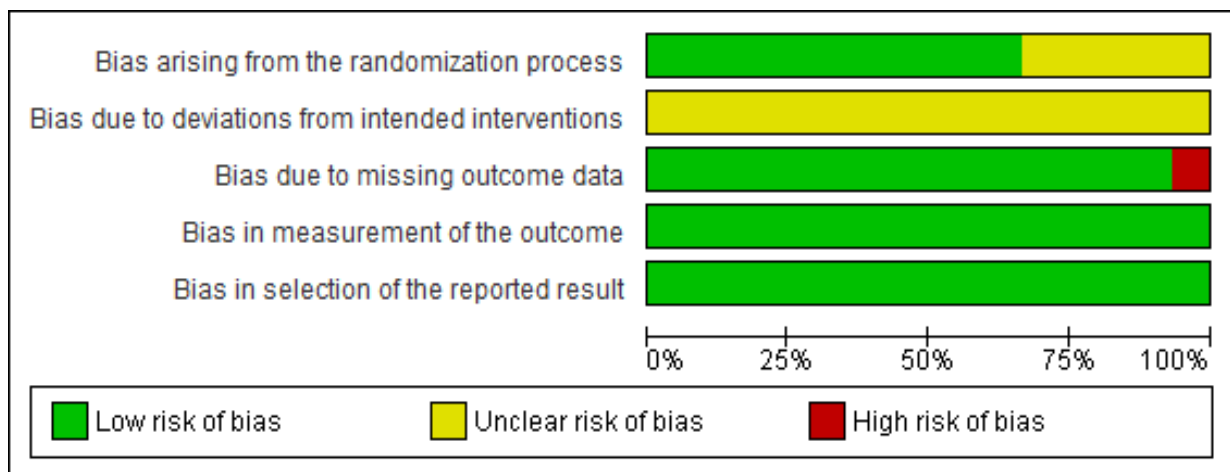

**Figure S11.** Risk of bias graph shows review authors' judgements about each risk of bias items presented as percentages across all included studies.

| Study                   | Bias arising from the randomization process | Bias due to deviations from intended interventions | Bias due to missing outcome data | Bias in measurement of the outcome | Bias in selection of the reported result |
|-------------------------|---------------------------------------------|----------------------------------------------------|----------------------------------|------------------------------------|------------------------------------------|
| Barnard et al., 2009    | +                                           | ?                                                  | -                                | +                                  | +                                        |
| Barnard et al., 2018    | ?                                           | ?                                                  | +                                | +                                  | +                                        |
| Bloomer et al., 2015    | +                                           | ?                                                  | +                                | +                                  | +                                        |
| Ferdowsian et al., 2010 | ?                                           | ?                                                  | +                                | +                                  | +                                        |
| Hunt et al., 1998       | ?                                           | ?                                                  | +                                | +                                  | +                                        |
| Lee et al., 2016        | +                                           | ?                                                  | +                                | +                                  | +                                        |
| Macknin et al., 2015    | +                                           | ?                                                  | +                                | +                                  | +                                        |
| Mishra et al., 2013     | +                                           | ?                                                  | +                                | +                                  | +                                        |
| Nicholson et al., 1999  | ?                                           | ?                                                  | +                                | +                                  | +                                        |
| Prescott et al., 1987   | +                                           | ?                                                  | +                                | +                                  | +                                        |
| Ramal et al., 2017      | +                                           | ?                                                  | +                                | +                                  | +                                        |
| Rouse et al., 1986      | ?                                           | ?                                                  | +                                | +                                  | +                                        |
| Sciarrone et al., 1993  | +                                           | ?                                                  | +                                | +                                  | +                                        |
| Toobert et al., 2000    | +                                           | ?                                                  | +                                | +                                  | +                                        |
| Wright et al., 2017     | +                                           | ?                                                  | +                                | +                                  | +                                        |

**Figure S12.** Risk of bias summary shows review authors' judgements about each risk of bias items for each included studies.

**Table S3.** GRADE quality assessment for the study findings was summarised as followed.

| № of studies                                                                                                         | Study design      | Risk of bias | Certainty assessment |              |             |                      | № of patients    |                 | Effect            |                                             | Certainty        | Importance |
|----------------------------------------------------------------------------------------------------------------------|-------------------|--------------|----------------------|--------------|-------------|----------------------|------------------|-----------------|-------------------|---------------------------------------------|------------------|------------|
|                                                                                                                      |                   |              | Inconsistency        | Indirectness | Imprecision | Other considerations | Vegetarian diets | Ominorous diets | Relative (95% CI) | Absolute (95% CI)                           |                  |            |
| Systolic blood pressure lowering (follow up: range 3 weeks to 74 weeks; assessed with: mm Hg; Scale from: 0 to 200)  |                   |              |                      |              |             |                      |                  |                 |                   |                                             |                  |            |
| 16                                                                                                                   | randomised trials | serious      | very serious         | not serious  | not serious | none                 | 444              | 440             | -                 | MD 2.655 lower (3.758 lower to 1.553 lower) | ⊕○○○<br>VERY LOW |            |
| Diastolic blood pressure lowering (follow up: range 3 weeks to 74 weeks; assessed with: mm Hg; Scale from: 0 to 200) |                   |              |                      |              |             |                      |                  |                 |                   |                                             |                  |            |
| 16                                                                                                                   | randomised trials | serious      | very serious         | not serious  | not serious | none                 | 444              | 440             | -                 | MD 1.687 lower (2.968 lower to 0.407 lower) | ⊕○○○<br>VERY LOW |            |

**CI:** Confidence interval; **MD:** Mean difference
